# Supplementary material
Source: publisher figshare collection journal article supplement (https://karger.figshare.com/articles/dataset/_/5127781)
Supplement: Supplementary file 2 [file 1]

## Appendix D: Effect sizes of individual studies including the outlier study by Van der Feltz-Cornelis and colleagues, 2007

### Physical symptoms - Post

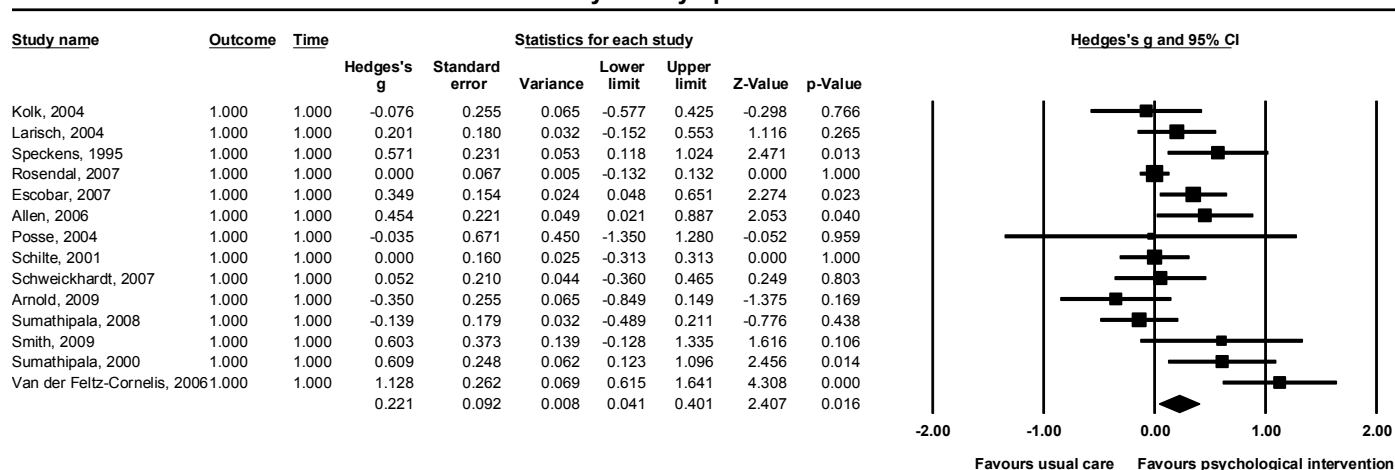

Relative effects between psychological interventions and usual care

### Physical symptoms - Follow-up

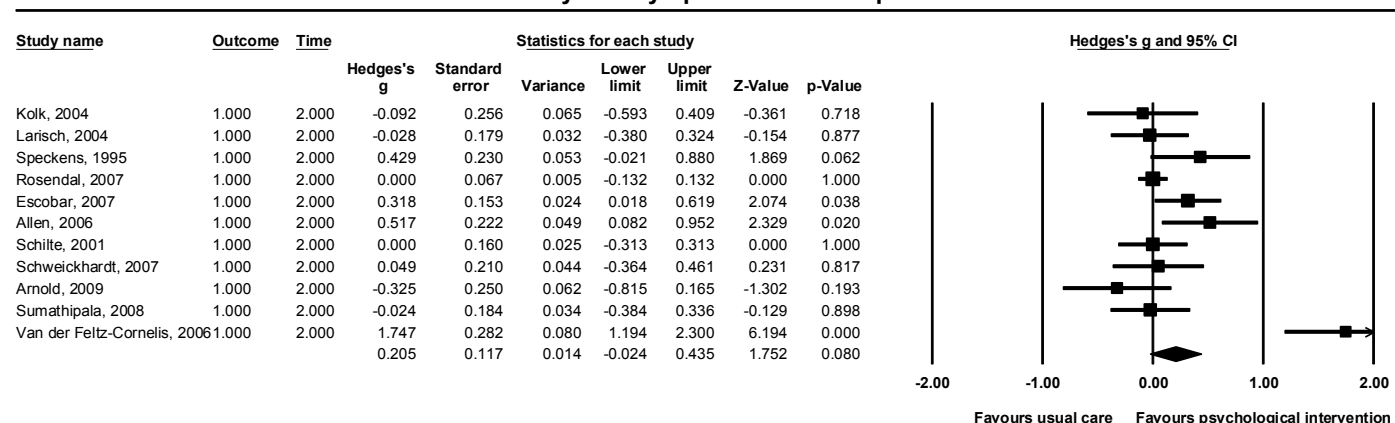

Relative effects between psychological interventions and usual care

### Physical functioning - Follow-up

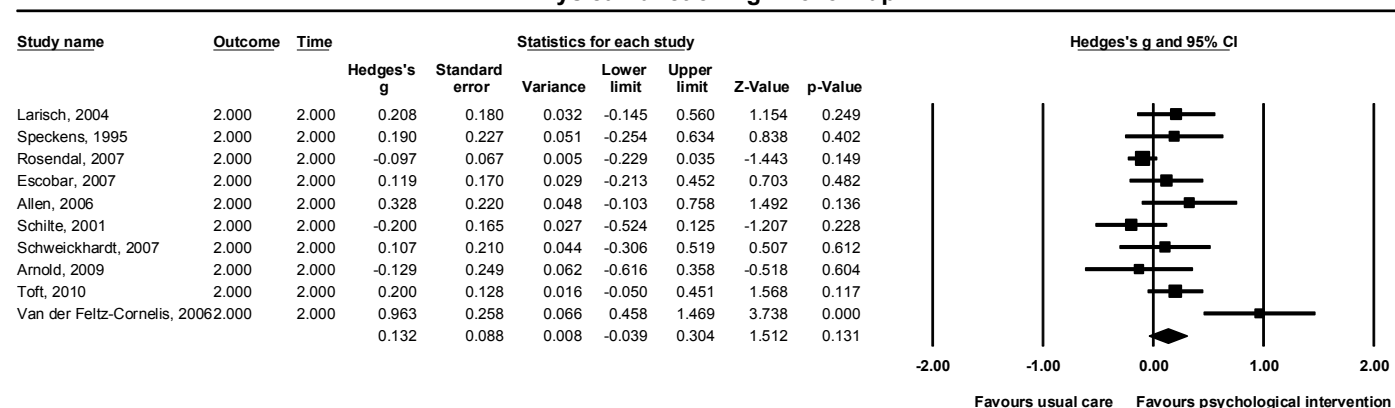

Relative effects between psychological interventions and usual care

**Appendix E:** Effect sizes of individual studies and pooled effect sizes per outcome domain, time point of assessment and intervention provider.

**Physical symptoms - Post - GP**

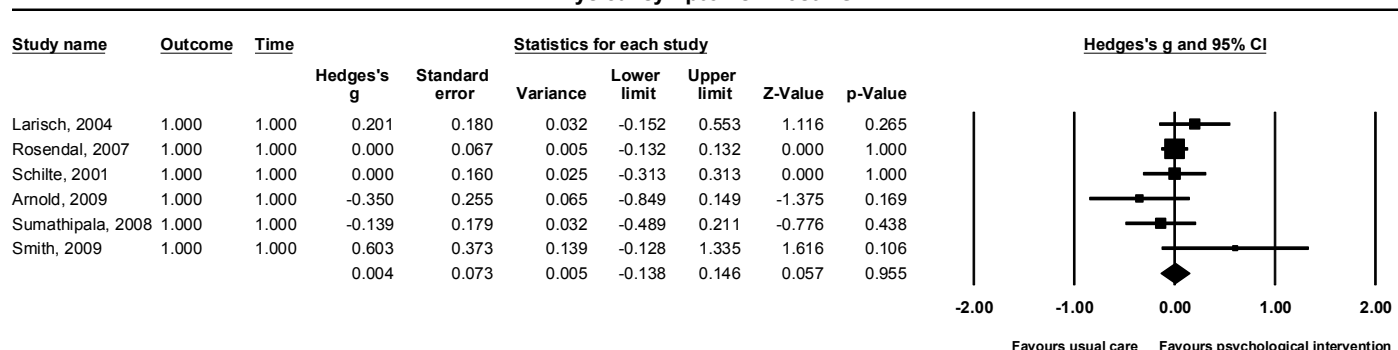

**Physical symptoms - Post - PT**

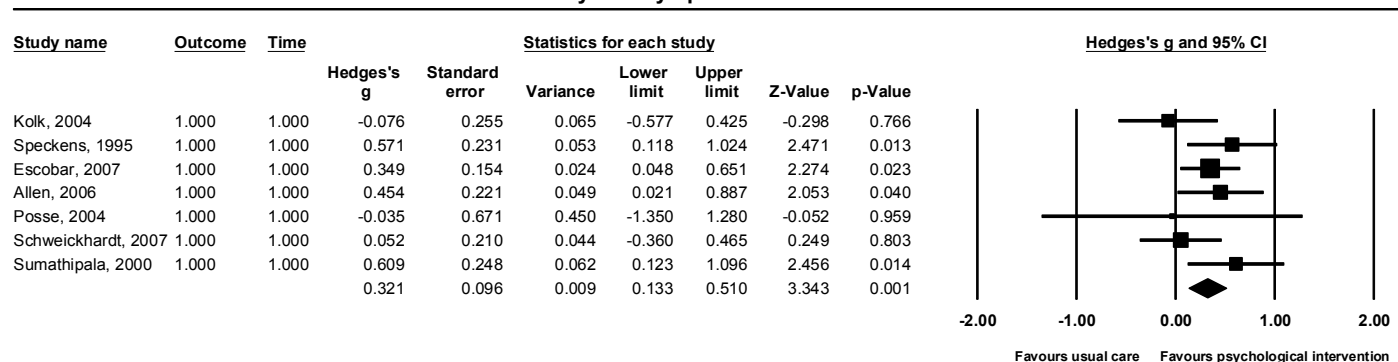

**Physical symptoms - Follow-up - GP**

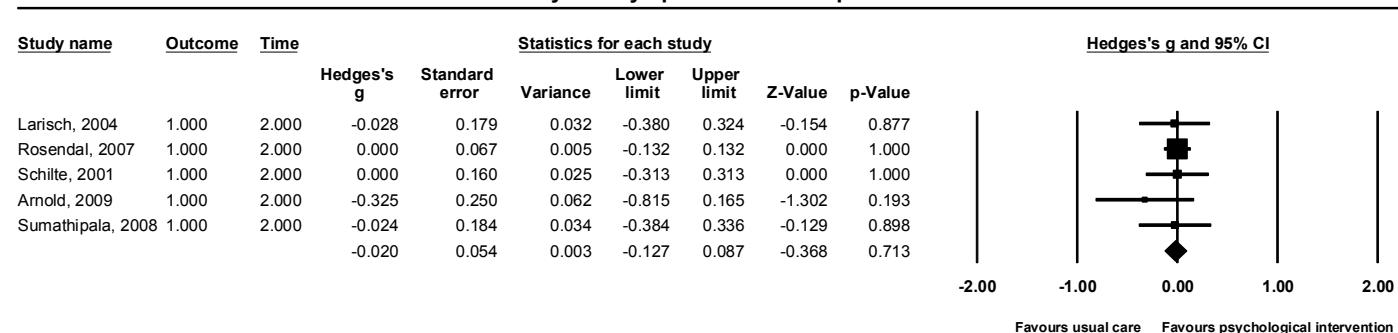

**Physical symptoms - Follow-up - PT**

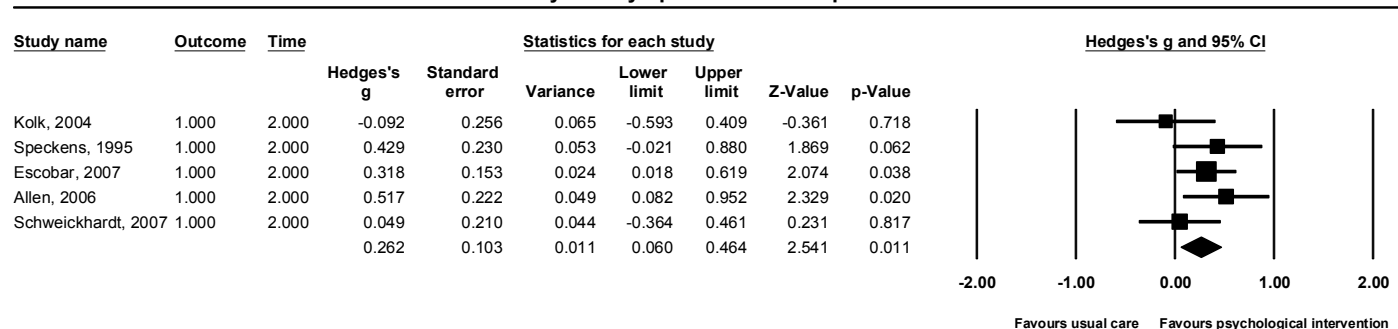

### Physical functioning - Post - GP

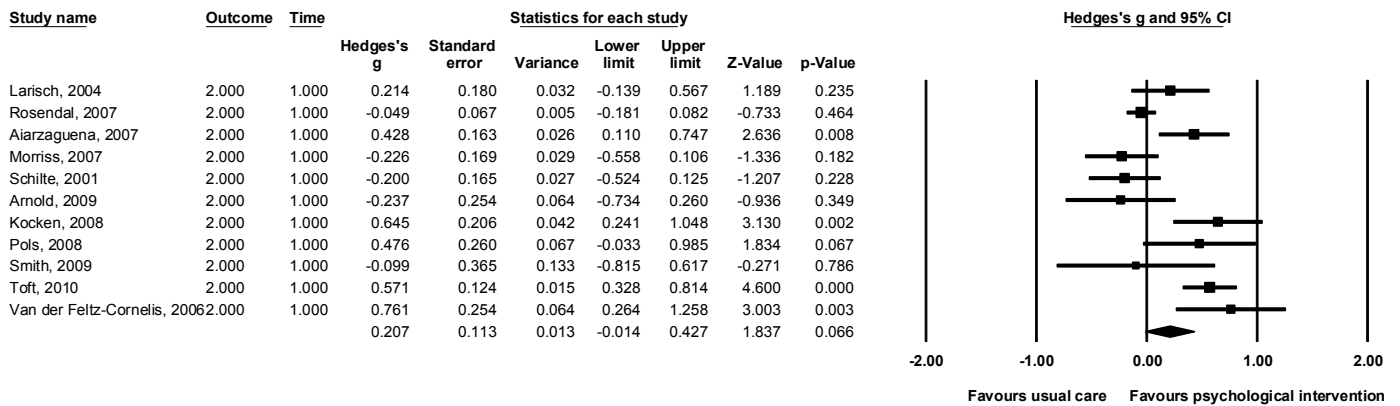

Relative effects between psychological interventions and usual care

### Physical functioning - Post - PT

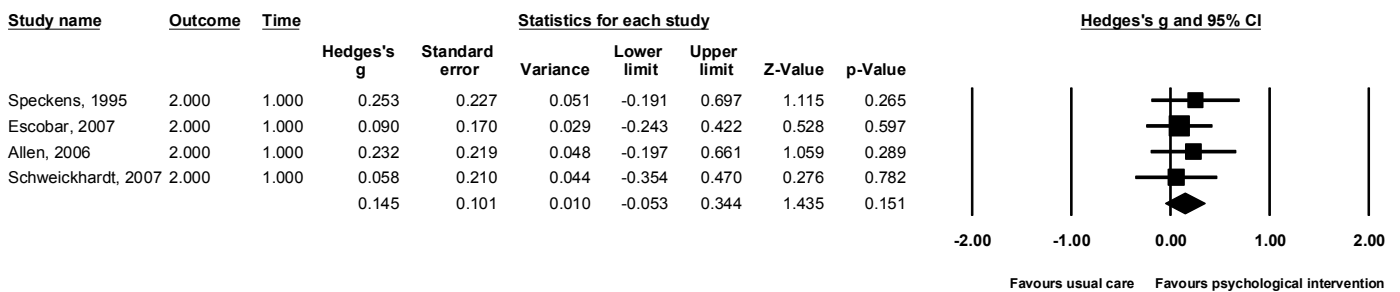

Relative effects between psychological interventions and usual care

### Physical functioning - Follow-up - GP

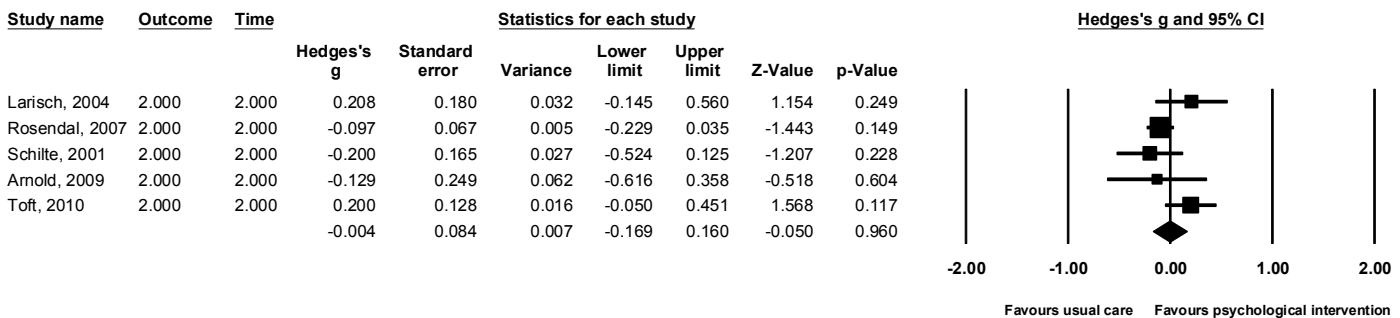

Relative effects between psychological interventions and usual care

### Physical functioning - Follow-up - PT

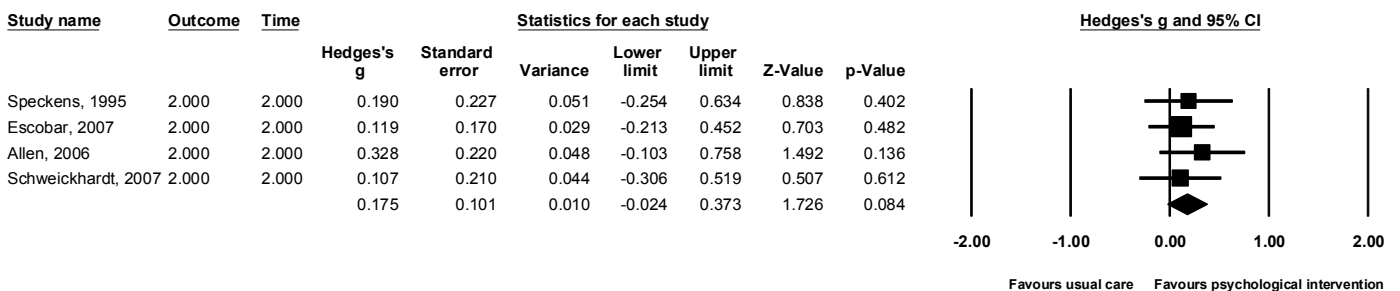

Relative effects between psychological interventions and usual care

### Psychological symptoms - Post - GP

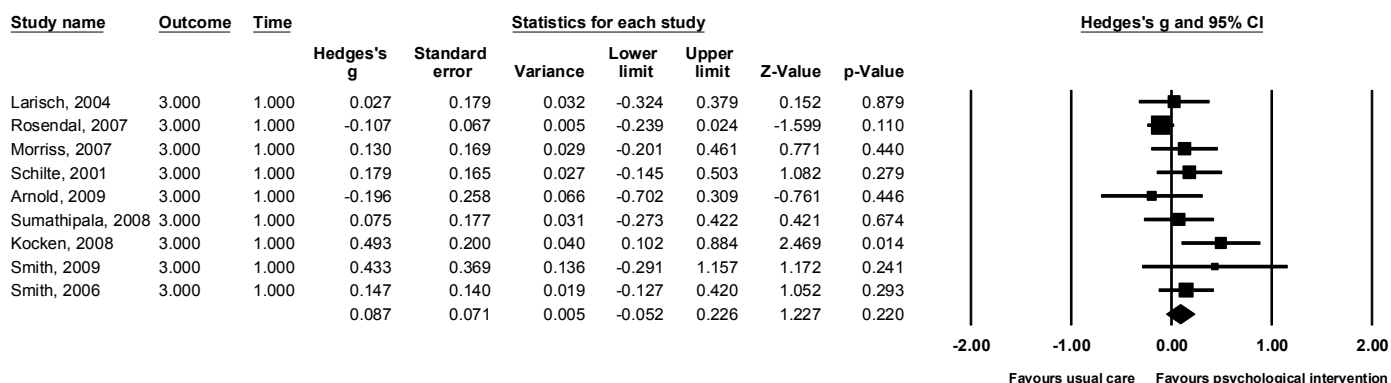

Relative effects between psychological interventions and usual care

### Psychological symptoms - Post - PT

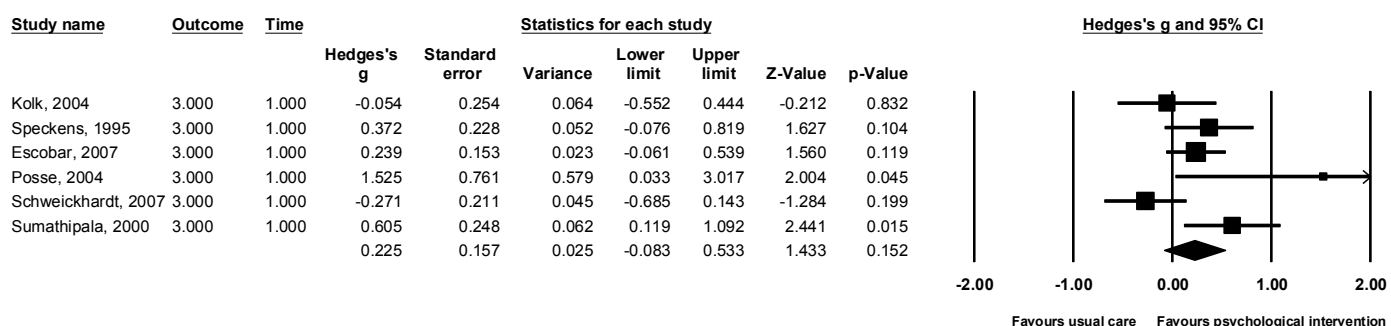

Relative effects between psychological interventions and usual care

### Psychological symptoms - Follow-up - GP

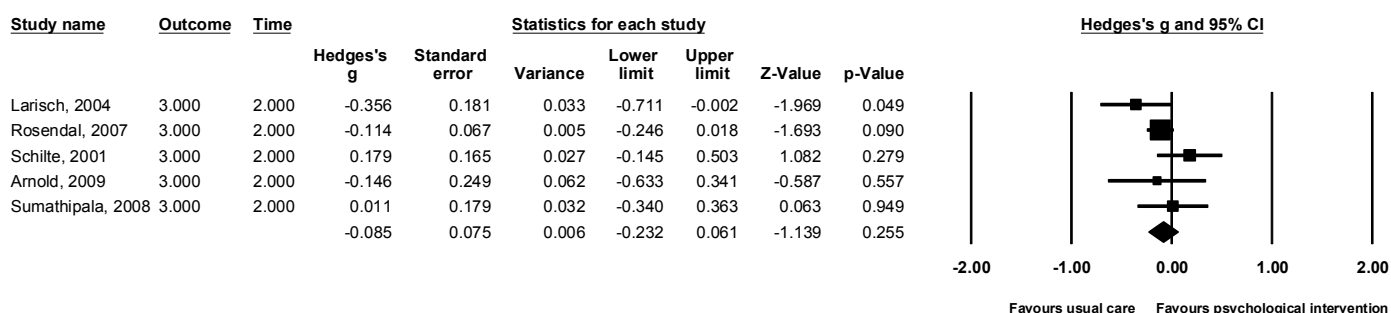

Relative effects between psychological interventions and usual care

### Psychological symptoms - Follow-up - PT

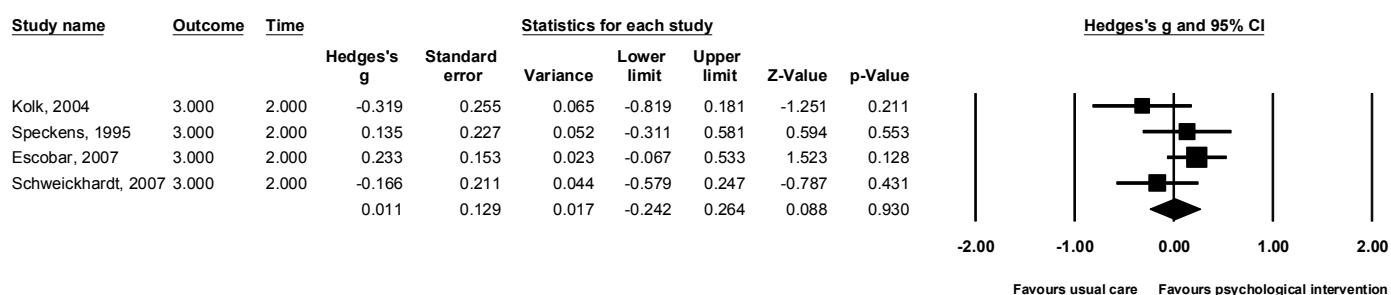

Relative effects between psychological interventions and usual care
