# Supplementary material
Source: publisher figshare collection journal article supplement (https://karger.figshare.com/articles/dataset/_/5127781)
Supplement: Supplementary file 4 [file 1]

## Appendix C. Characteristics of included studies

| Study            | Study sample                      | Intervention         | Method                       | Outcome domains and measures       |
|------------------|-----------------------------------|----------------------|------------------------------|------------------------------------|
| First author     | a) MUS Criteria                   | a) Provider;         | a) Analysis                  | a) Physical symptoms               |
| Publication year | b) MUS Severity                   | b) Intervention type | b) Sample size (IG/CG);      | b) Physical functioning            |
|                  | c) Mean age;                      | c) Mean number of    | c) Follow-up: months after   | c) Psychological symptoms          |
|                  | d) % of women                     | sessions             | baseline or post assessment  |                                    |
|                  | e) Additional problems            |                      | d) Concealment of allocation |                                    |
| Aiarzaguena      | a) SSI 4,6                        | a) GP                | a) ITT                       | a) n.r.                            |
| 2007             | b) severe MUS                     | b) other PI          | b) 156 (76/80)               | b) MOS-12                          |
|                  | c) 47                             | c) 6                 | c) No follow-up              | c) n.r.                            |
|                  | d) 81%                            |                      | d) n.r.                      |                                    |
|                  | e) anxiety or depressive disorder |                      |                              |                                    |
| Allen            | a) Somatization Disorder          | a) PT                | a) ITT                       | a) CGI-SD, the Severity of Somatic |
| 2006             | b) severe MUS                     | b) CBT approaches    | b) 84 (43/41)                | Symptoms Scale                     |
|                  | c) 46.7                           | c) 9.2               | c) Follow-up: 12 (post)      | b) MOS-12                          |
|                  | d) 90%                            |                      | d) n.r.                      | c) n.r.                            |

|         |                                                   |                   |                             |                                     |
|---------|---------------------------------------------------|-------------------|-----------------------------|-------------------------------------|
| Arnold  | a) Somatoform Disorder                            | a) GP             | a) ITT                      | a) PSC-51                           |
| 2009    | b) non-severe MUS                                 | b) CBT approaches | b) 65 (31/34)               | b) MOS-12                           |
|         | c) 47                                             | c) 3.5            | c) Follow-up: 12 (baseline) | c) HADS                             |
|         | d) 88%                                            |                   | d) n.r.                     |                                     |
| Escobar | a) SSI 4,6                                        | a) PT             | a) ITT                      | a) PHQ-15                           |
| 2007    | b) severe MUS                                     | b) CBT approaches | b) 172 (87/85)              | b) MOS-10                           |
|         | c) 40.3                                           | c) 10             | c) Follow-up: 6 (post)      | c) HAM-D, HAM-A                     |
|         | d) 88%                                            |                   | d) adequate                 |                                     |
|         | e) anxiety or depressive disorder                 |                   |                             |                                     |
| Kocken  | a) Frequently GP visits for at least 3 months; no | a) GP             | a) Completer                | a) n.r.                             |
| 2008    | physical abnormalities, or unhappy with progress  | b) enhanced care  | b) 104 (56/48)              | b) General health assessed with one |
|         | b) non-severe MUS                                 | c) 6.3            | c) No follow-up             | item from SF-36;                    |
|         | c) 42                                             |                   | d) n.r.                     | c) SCL-90                           |
|         | d) 100%                                           |                   |                             |                                     |
|         | e) female immigrants, unemployed                  |                   |                             |                                     |
| Kolk    | a) MUS confirmed by GP in the last 3-12 months    | a) PT             | a) ITT                      | a) SCL-12, GP's rating of MUS       |
| 2004    | b) non-severe MUS                                 | b) other PI       | b) 106 (83/23)              | b) n.r.                             |
|         | c) 35.4                                           | c) 9.2            | c) Follow-up: 12 (baseline) | c) SCL-90 (depression and anxiety   |
|         | d) 73%                                            |                   | d) n.r.                     | scale)                              |

|          |                                                    |                   |                             |                                |
|----------|----------------------------------------------------|-------------------|-----------------------------|--------------------------------|
| Larisch  | a) SSI 4,6                                         | a) GP             | a) ITT                      | a) SOMS-7                      |
| 2004     | b) severe MUS                                      | b) CBT approaches | b) 127 (73/54)              | b) MOS-12                      |
|          | c) 44.7                                            | c) 4.8            | c) Follow-up: 12 (baseline) | c) HADS-D, GHQ-12              |
|          | d) 72%                                             |                   | d) adequate                 |                                |
| Morriss  | a) MUS confirmed by GP for at least 3 months       | a) GP             | a) ITT                      | a) n.r.                        |
| 2007     | b) non-severe MUS                                  | b) CBT approaches | b) 141 (66/75)              | b) EQ-5D mean score            |
|          | c) 51.2                                            | c) unclear        | c) No follow-up             | c) HADS - caseness             |
|          | d) 70%                                             |                   | d) n.r.                     |                                |
| Pols     | a) GP diagnosis of MUS or somatisation             | a) GP             | a) Completer                | a) n.r.                        |
| 2008     | b) non-severe MUS                                  | b) enhanced care  | b) 133 (89/44)              | b) SF-36 PCS                   |
|          | c) 51.6                                            | c) unclear        | c) No follow-up             | c) n.r.                        |
|          | d) 74%                                             |                   | d) n.r.                     |                                |
| Posse    | a) High score on Symptom List by Money and Patient | a) PT             | a) Completer                | a) Symptom List by Money, 1976 |
| 2004     | Pain Drawing Test                                  | b) other PI       | b) 10 (5/5)                 | b) n.r.                        |
|          | b) non-severe MUS                                  | c) unclear        | c) No follow-up             | c) KSP (somatic anxiety scale) |
|          | c) 43.6                                            |                   | d) n.r.                     |                                |
|          | d) 70%                                             |                   |                             |                                |
| Rosendal | a) Positive score on SCL-SOM or Whiteley-7         | a) GP             | a) Completer                | a) SCL-12                      |
| 2007     | b) severe MUS                                      | b) CBT approaches | b) 911 (506/405)            | b) SF-36 PCS                   |

|                       |                                                                  |                                                      |                                                                              |                                                                                                                       |
|-----------------------|------------------------------------------------------------------|------------------------------------------------------|------------------------------------------------------------------------------|-----------------------------------------------------------------------------------------------------------------------|
|                       | c) 41.9<br>d) 65%                                                | c) unclear                                           | c) Follow-up: 12 (baseline)<br>d) adequate                                   | c) SCL-90 (general mental illness scale)                                                                              |
| Schilte<br>2001       | a) Number of MUS $\geq 5$<br>b) severe MUS<br>c) 38.5<br>d) 79%  | a) GP<br>b) other PI<br>c) 2                         | a) Completer<br>b) 161 (81/80)<br>c) Follow-up: 24 (baseline)<br>d) adequate | a) SCL-12<br>b) VAS quality of life, subjective health rated by patient (1-100)<br>c) SCL-90 (anxiety and depression) |
| Schweickhardt<br>2007 | a) SSI 4,6<br>b) severe MUS<br>c) 46.6<br>d) 70%                 | a) PT<br>b) other PI<br>c) 4.2                       | a) ITT<br>b) 91 (49/42)<br>c) Follow-up: 6 (post)<br>d) n.r.                 | a) SOMS-7 (intensity and frequency)<br>b) SF-12<br>c) HADS, GHQ                                                       |
| Smith<br>2009         | a) MUS confirmed by GP<br>b) non-severe MUS<br>c) 52.5<br>d) 83% | a) GP<br>b) enhanced care<br>c) 7                    | a) Completer<br>b) 30 (15/15)<br>c) No follow-up<br>d) n.r.                  | a) PHQ-15<br>b) SF-36 PCS<br>c) SSAS, CES-D                                                                           |
| Smith<br>2006         | a) MUS confirmed by GP<br>b) non-severe MUS<br>c) 47.7<br>d) 79% | a) nurse practitioner<br>b) enhanced care<br>c) 14.6 | a) ITT<br>b) 206 (101/105)<br>c) No follow-up<br>d) n.r.                     | a) n.r.<br>b) n.r.<br>c) CES-D                                                                                        |
| Speckens              | a) MUS with a score of $\geq 5$ for intensity                    | a) PT                                                | a) ITT                                                                       | a) Intensity of indicated MUS                                                                                         |

|                        |                                                        |                   |                             |                                |
|------------------------|--------------------------------------------------------|-------------------|-----------------------------|--------------------------------|
| 1995                   | b) non-severe MUS                                      | b) CBT approaches | b) 79 (39/40)               | b) VAS functional impairment   |
|                        | c) 37.1                                                | c) 11.8           | c) Follow-up: 12 (baseline) | c) HADS                        |
|                        | d) 50%                                                 |                   | d) n.r.                     |                                |
| Sumathipala            | a) Number of MUS $\geq 5$                              | a) PT             | a) ITT                      | a) BSI, MUS assessed by trial  |
| 2000                   | b) severe MUS                                          | b) CBT approaches | b) 68 (34/34)               | coordinator                    |
|                        | c) 38.4                                                | c) 6              | c) No follow-up             | b) n.r.                        |
|                        | d) 71%                                                 |                   | d) adequate                 | c) GHQ-30                      |
| Sumathipala            | a) Number of MUS $\geq 5$ for at least 6 months        | a) GP             | a) Completer/ITT            | a) BSI, MUS assessed by trial  |
| 2008                   | b) severe MUS                                          | b) CBT approaches | b) 150 (75/75)              | coordinator                    |
|                        | c) 35                                                  | c) 4.5            | c) Follow-up: 12 (baseline) | b) n.r.                        |
|                        | d) 78%                                                 |                   | d) adequate                 | c) GHQ-30                      |
|                        | e) help assistant for daily activities necessary       |                   |                             |                                |
| Toft                   | a) Whiteley-7 score $\geq 2$ or SCL-SOM score $\geq 4$ | a) GP             | a) Completer                | a) n.r.                        |
| 2010                   | b) non-severe MUS                                      | b) CBT approaches | b) 350 (155/195)            | b) MOS-12                      |
|                        | c) 41.2                                                | c) unclear        | c) Follow-up: 24 (baseline) | c) n.r.                        |
|                        | d) 73%                                                 |                   | d) adequate                 |                                |
| van der Feltz-Cornelis | a) Previous unexplained symptoms and continuing        | a) GP             | a) ITT                      | a) Checklist by Speckens, 1995 |
| 2006                   | request for further diagnosis                          | b) CBT approaches | b) 81 (58/23)               | b) SIP                         |
|                        | b) non-severe MUS                                      | c) unclear        | c) Follow-up: 6 (baseline)  | c) n.r.                        |

---

c) 44

d) n.r.

d) 76%

e) anxiety or depressive disorder

---
