# Supplementary material
Source: publisher figshare collection journal article supplement (https://karger.figshare.com/articles/dataset/_/5127781)
Supplement: Supplementary file 5 [file 1]

## Appendix A: Search strategy.

### MEDLINE (Ovid)

|              |                                                                                                                                                                                                                                                                                                                                                                                                                                                                                                                                                                                                                                                                                                                                                                                                                                                                                                                                                                                                                                                                                                                                                                                                                                                                                                                                                                                                                                                                                                                                                                                                                                                                                                                                                                                                                                                                           |
|--------------|---------------------------------------------------------------------------------------------------------------------------------------------------------------------------------------------------------------------------------------------------------------------------------------------------------------------------------------------------------------------------------------------------------------------------------------------------------------------------------------------------------------------------------------------------------------------------------------------------------------------------------------------------------------------------------------------------------------------------------------------------------------------------------------------------------------------------------------------------------------------------------------------------------------------------------------------------------------------------------------------------------------------------------------------------------------------------------------------------------------------------------------------------------------------------------------------------------------------------------------------------------------------------------------------------------------------------------------------------------------------------------------------------------------------------------------------------------------------------------------------------------------------------------------------------------------------------------------------------------------------------------------------------------------------------------------------------------------------------------------------------------------------------------------------------------------------------------------------------------------------------|
| Diagnosis    | initial search: exp somatoform disorders<br>update: exp somatoform disorders/ or exp hypochondriasis                                                                                                                                                                                                                                                                                                                                                                                                                                                                                                                                                                                                                                                                                                                                                                                                                                                                                                                                                                                                                                                                                                                                                                                                                                                                                                                                                                                                                                                                                                                                                                                                                                                                                                                                                                      |
|              | initial search: somatoform or somati?ation* or hypochondri*.tw.<br>update: multisomatoform or (medical* unexplain* symptom*) or (unexplained physical symptom*) or (somati?ing patient)                                                                                                                                                                                                                                                                                                                                                                                                                                                                                                                                                                                                                                                                                                                                                                                                                                                                                                                                                                                                                                                                                                                                                                                                                                                                                                                                                                                                                                                                                                                                                                                                                                                                                   |
| Design       | randomized controlled trial.pt. or controlled clinical trial.pt. or randomized.ab. or placebo.ab. or clinical trials as topic.sh. or randomly.ab. or trial.ti.ab. or groups.ab.                                                                                                                                                                                                                                                                                                                                                                                                                                                                                                                                                                                                                                                                                                                                                                                                                                                                                                                                                                                                                                                                                                                                                                                                                                                                                                                                                                                                                                                                                                                                                                                                                                                                                           |
| Intervention | psychotherapy/ or aromatherapy/ or art therapy/ or autogenic training/ or behavior therapy/ or aversive therapy/ or "biofeedback (psychology)"/ or cognitive therapy/ or desensitization, psychologic/ or implosive therapy/ or relaxation techniques/ or meditation/ or bibliotherapy/ or color therapy/ or crisis intervention/ or dance therapy/ or gestalt therapy/ or hypnosis/ or suggestion/ or autosuggestion/ or "imagery (psychotherapy)"/ or music therapy/ or nondirective therapy/ or psychoanalytic therapy/ or free association/ or transactional analysis/ or psychotherapeutic processes/ or abreaction/ or catharsis/ or association/ or "countertransference (psychology)"/ or psychotherapy, brief/ or psychotherapy, multiple/ or psychotherapy, rational-emotive/ or reality therapy/ or socioenvironmental therapy/ or milieu therapy/ or therapeutic community/ or psychodrama/ or role playing/ (Psychotherap* or ((centered or based or focused or oriented or acceptance or attachment or behavior?r* or analytic* or brief or person or cognitive or dynamic or energetic or coherence or collaborative or contemplative or dasein* or drama* or emotion* or feminist or sensiti?ation or existen* or exposure or gestalt or holistic or humanistic or hypno* or integr* or short-term* or shortterm* or long-term* or longterm* or interpersonal* or inter-personal* or logo* or mindfulness* or multimodal or multi-modal or narrative or positive or provocative or psychol* or rational* or reality or solution* or system* or transactional* or transpersonal or eclectic* or experiential* or expressive* or individual or insight* or persuasion or relationship or supportive* or implosive or inhibition or aversion or relaxation or talk or confront* or schema*) adj5 (treatment* or therapy or therapies)) or intervention*).tw. |
| Humans       | Humans/                                                                                                                                                                                                                                                                                                                                                                                                                                                                                                                                                                                                                                                                                                                                                                                                                                                                                                                                                                                                                                                                                                                                                                                                                                                                                                                                                                                                                                                                                                                                                                                                                                                                                                                                                                                                                                                                   |

### EMBASE (Ovid)

|              |                                                                                                                                                                                                                                                                                                                                                                                                                                                                                                                                                                                                                                                                                                                    |
|--------------|--------------------------------------------------------------------------------------------------------------------------------------------------------------------------------------------------------------------------------------------------------------------------------------------------------------------------------------------------------------------------------------------------------------------------------------------------------------------------------------------------------------------------------------------------------------------------------------------------------------------------------------------------------------------------------------------------------------------|
| Diagnosis    | somatoform disorder/ or somatization /or hypochondriasis                                                                                                                                                                                                                                                                                                                                                                                                                                                                                                                                                                                                                                                           |
|              | somatoform or somati?ation* or hypochondri*.tw.                                                                                                                                                                                                                                                                                                                                                                                                                                                                                                                                                                                                                                                                    |
| Design       | exp controlled clinical trial/ or comparative study/ or treatment outcome/ or random*.tw. or clinical trial*.tw.                                                                                                                                                                                                                                                                                                                                                                                                                                                                                                                                                                                                   |
| Intervention | counter transference/ or crisis intervention/ or hypnosis/ or psychoanalysis/ or suggestion/ or transference/ or psychotherapy/ or art therapy/ or assertive training/ or autogenic training/ or aversion therapy/ or behavior contracting/ or behavior modification/ or behavior therapy/ or cognitive behavioral stress management/ or cognitive rehabilitation/ or cognitive therapy/ or gestalt therapy/ or guided imagery/ or milieu therapy/ or music therapy/ or pet therapy/ or psychodrama/ or relaxation training/ or role playing/ or sex therapy/ or sociotherapy/ or therapeutic community/ or validation therapy/<br>(see Medline term list for text words referring to psychological interventions) |
| Humans       | "Human" [Subjects]                                                                                                                                                                                                                                                                                                                                                                                                                                                                                                                                                                                                                                                                                                 |

### PsycINFO (Ovid)

|              |                                                                                                                                                                                                                                                                                                                                                                                                                                                                                                                                                                                                                                                                                                                                                                                                                                                                                                                                                                                                                                                                                                                                                                                                                                                                                                                                                                                                                                                                                                                                                                                                                                                                                                                                                                                                                                       |
|--------------|---------------------------------------------------------------------------------------------------------------------------------------------------------------------------------------------------------------------------------------------------------------------------------------------------------------------------------------------------------------------------------------------------------------------------------------------------------------------------------------------------------------------------------------------------------------------------------------------------------------------------------------------------------------------------------------------------------------------------------------------------------------------------------------------------------------------------------------------------------------------------------------------------------------------------------------------------------------------------------------------------------------------------------------------------------------------------------------------------------------------------------------------------------------------------------------------------------------------------------------------------------------------------------------------------------------------------------------------------------------------------------------------------------------------------------------------------------------------------------------------------------------------------------------------------------------------------------------------------------------------------------------------------------------------------------------------------------------------------------------------------------------------------------------------------------------------------------------|
| Diagnosis    | initial search: somatoform disorders/ or somatization disorder/ or somatization/ or hypochondriasis<br>update: exp somatoform disorders/ or exp hypochondriasis                                                                                                                                                                                                                                                                                                                                                                                                                                                                                                                                                                                                                                                                                                                                                                                                                                                                                                                                                                                                                                                                                                                                                                                                                                                                                                                                                                                                                                                                                                                                                                                                                                                                       |
|              | initial search: somatoform or somati?ation* or hypochondri*.tw.<br>update: Somatoform or Somati?ation or hypochondr* or Multisomatoform or (Medical* adj1 unexplain* adj1 symptom*) or (health adj1 anxiety) or (unexplained adj1 physical adj1 symptom*) or (somati?ing adj1 patient*)                                                                                                                                                                                                                                                                                                                                                                                                                                                                                                                                                                                                                                                                                                                                                                                                                                                                                                                                                                                                                                                                                                                                                                                                                                                                                                                                                                                                                                                                                                                                               |
| Design       | (random* or placebo* or assign* or allocat*).mp. or (control* or compar* or ((clin* or evaluat* or prospectiv*) adj3 (trial* or studi* or study))).tw. or exp treatment effectiveness evaluation/ or exp experimental design/ or versus.id. or vs.id.                                                                                                                                                                                                                                                                                                                                                                                                                                                                                                                                                                                                                                                                                                                                                                                                                                                                                                                                                                                                                                                                                                                                                                                                                                                                                                                                                                                                                                                                                                                                                                                 |
| Intervention | psychotherapy/ or adlerian psychotherapy/ or adolescent psychotherapy/ or analytical psychotherapy/ or autogenic training/ or brief psychotherapy/ or client centered therapy/ or cognitive behavior therapy/ or eclectic psychotherapy/ or emotion focused therapy/ or existential therapy/ or experiential psychotherapy/ or expressive psychotherapy/ or eye movement desensitization therapy/ or feminist therapy/ or geriatric psychotherapy/ or gestalt therapy/ or guided imagery/ or individual psychotherapy/ or insight therapy/ or integrative psychotherapy/ or interpersonal psychotherapy/ or logotherapy/ or narrative therapy/ or persuasion therapy/ or primal therapy/ or psychodrama/ or psychodynamic psychotherapy/ or rational emotive behavior therapy/ or reality therapy/ or relationship therapy/ or solution focused therapy/ or supportive psychotherapy/ or transactional analysis/ or exp behavior therapy/ or exp exposure therapy/ or exp aversion therapy/ or exp humanistic psychotherapy/ or exp hypnotherapy/ or exp psychoanalysis/ or psychotherapeutic counseling/ or behavior modification/ or biofeedback training/ or exp contingency management/ or "fading (conditioning)"/ or exp self management/ or bibliotherapy/ or computer assisted therapy/ or movement therapy/ or multimodal treatment approach/ or online therapy/ or partial hospitalization/ or personal therapy/ or sex therapy/ or exp cognitive techniques/ or exp creative arts therapy/ or exp cross cultural treatment/ or outpatient treatment/ or animal assisted therapy/ or mirroring/ or morita therapy/ or motivational interviewing/ or mutual storytelling technique/ or paradoxical techniques/ or exp relaxation therapy/<br>(see Medline term list for text words referring to psychological interventions) |

### CENTRAL

|              |                                                                                                                                                                                                                                                                                                                                                              |
|--------------|--------------------------------------------------------------------------------------------------------------------------------------------------------------------------------------------------------------------------------------------------------------------------------------------------------------------------------------------------------------|
| Diagnosis    | initial search: Somatoform Disorders (explode all trees)<br>update: Somatoform Disorders, (this term only)                                                                                                                                                                                                                                                   |
|              | initial search: somatoform or somati?ation* or hypochondri*<br>update: (medical* NEXT unexplain* NEXT symptom*):ti,ab,kw or (Somatoform or Somati?ation or hypochondr* or multisomatoform):ti,ab,kw or (Somati?ing NEXT patient*):ti,ab,kw or "Health anxiety":ti,ab,kw or (Unexplain* NEXT physical* NEXT symptom*):ti,ab,kw                                |
| Intervention | Psychotherapy (explode all trees)                                                                                                                                                                                                                                                                                                                            |
|              | Psychotherap* or intervention* or (Centered NEAR5 treatment*) or (Centered NEAR5 therapy) or (Centered NEAR5 therapies) or (based NEAR5 treatment*) or (based NEAR5 therapy) or (based NEAR5 therapies) or (acceptance NEAR5 treatment*) or (acceptance NEAR5 therapy) or (acceptance NEAR5 therapies) or (attachment NEAR5 treatment*) or (attachment NEAR5 |

|  |                                                                                                                                                                                                                                                                                                                                                                                                                                                                                                                                                                                                                                                                                                                                                                                                                                                                                                                                                                                                                                                                                                                                                                                                                                                                                                                                                                                                                                                                                                                                                                                                                                                                                                                                                                                                                                                                                                                                                                                                                                                                                                                                                                                                                                                                                                                                                                                                                                                                                                                                                                                                                                                                                                                                                                                                                                                                                                                                                                                                                                                                                                                                                                                                                                                                                                                                                                                                                                                                                                                                                                                                                                                                                                                                                                                                                                                                                                                                                                                                                                                                                                                                                                                                                                                                                                                                                                                                                                                                                                                                                                                                                                                                                                                                                                                                                                                                                                                                                                                                                                                                                                                                                                                                                                                                                                                                                                                                                                                                                                                                                                                                                                                                                                                                                                                                                                       |
|--|---------------------------------------------------------------------------------------------------------------------------------------------------------------------------------------------------------------------------------------------------------------------------------------------------------------------------------------------------------------------------------------------------------------------------------------------------------------------------------------------------------------------------------------------------------------------------------------------------------------------------------------------------------------------------------------------------------------------------------------------------------------------------------------------------------------------------------------------------------------------------------------------------------------------------------------------------------------------------------------------------------------------------------------------------------------------------------------------------------------------------------------------------------------------------------------------------------------------------------------------------------------------------------------------------------------------------------------------------------------------------------------------------------------------------------------------------------------------------------------------------------------------------------------------------------------------------------------------------------------------------------------------------------------------------------------------------------------------------------------------------------------------------------------------------------------------------------------------------------------------------------------------------------------------------------------------------------------------------------------------------------------------------------------------------------------------------------------------------------------------------------------------------------------------------------------------------------------------------------------------------------------------------------------------------------------------------------------------------------------------------------------------------------------------------------------------------------------------------------------------------------------------------------------------------------------------------------------------------------------------------------------------------------------------------------------------------------------------------------------------------------------------------------------------------------------------------------------------------------------------------------------------------------------------------------------------------------------------------------------------------------------------------------------------------------------------------------------------------------------------------------------------------------------------------------------------------------------------------------------------------------------------------------------------------------------------------------------------------------------------------------------------------------------------------------------------------------------------------------------------------------------------------------------------------------------------------------------------------------------------------------------------------------------------------------------------------------------------------------------------------------------------------------------------------------------------------------------------------------------------------------------------------------------------------------------------------------------------------------------------------------------------------------------------------------------------------------------------------------------------------------------------------------------------------------------------------------------------------------------------------------------------------------------------------------------------------------------------------------------------------------------------------------------------------------------------------------------------------------------------------------------------------------------------------------------------------------------------------------------------------------------------------------------------------------------------------------------------------------------------------------------------------------------------------------------------------------------------------------------------------------------------------------------------------------------------------------------------------------------------------------------------------------------------------------------------------------------------------------------------------------------------------------------------------------------------------------------------------------------------------------------------------------------------------------------------------------------------------------------------------------------------------------------------------------------------------------------------------------------------------------------------------------------------------------------------------------------------------------------------------------------------------------------------------------------------------------------------------------------------------------------------------------------------------------------------------------------|
|  | therapy) or (attachment NEAR5 therapies) or (behavior?r* NEAR5 treatment*) or (behavior?r* NEAR5 therapy) or (behavior?r* NEAR5 therapies) or (analytic* NEAR5 treatment*) or (analytic* NEAR5 therapy) or (analytic* NEAR5 therapies) or (brief NEAR5 treatment*) or (brief NEAR5 therapy) or (brief NEAR5 therapies) or (person NEAR5 treatment*) or (person NEAR5 therapy) or (person NEAR5 therapies) or (cognitive NEAR5 treatment*) or (cognitive NEAR5 therapy) or (cognitive NEAR5 therapies) or (dynamic NEAR5 treatment*) or (dynamic NEAR5 therapy) or (dynamic NEAR5 therapies) or (energetic NEAR5 treatment*) or (energetic NEAR5 therapy) or (energetic NEAR5 therapies) or (coherence NEAR5 treatment*) or (coherence NEAR5 therapy) or (coherence NEAR5 therapies) or (collaborative NEAR5 treatment*) or (collaborative NEAR5 therapy) or (collaborative NEAR5 therapies) or (contemplative NEAR5 treatment*) or (contemplative NEAR5 therapy) or (contemplative NEAR5 therapies) or (dasein* NEAR5 treatment*) or (dasein* NEAR5 therapy) or (dasein* NEAR5 therapies) or (drama* NEAR5 treatment*) or (drama* NEAR5 therapy) or (drama* NEAR5 therapies) or (emotion* NEAR5 treatment*) or (emotion* NEAR5 therapy) or (emotion* NEAR5 therapies) or (feminist NEAR5 treatment*) or (feminist NEAR5 therapy) or (feminist NEAR5 therapies) or (sensiti?ation NEAR5 treatment*) or (sensiti?ation NEAR5 therapy) or (sensiti?ation NEAR5 therapies) or (existen* NEAR5 treatment*) or (existen* NEAR5 therapy) or (existen* NEAR5 therapies) or (exposure NEAR5 treatment*) or (exposure NEAR5 therapy) or (exposure NEAR5 therapies) or (gestalt NEAR5 treatment*) or (gestalt NEAR5 therapy) or (gestalt NEAR5 therapies) or (holistic NEAR5 treatment*) or (holistic NEAR5 therapy) or (holistic NEAR5 therapies) or (humanistic NEAR5 treatment*) or (humanistic NEAR5 therapy) or (humanistic NEAR5 therapies) or (hypno* NEAR5 treatment*) or (hypno* NEAR5 therapy) or (hypno* NEAR5 therapies) or (integr* NEAR5 treatment*) or (integr* NEAR5 therapy) or (integr* NEAR5 therapies) or (short-term* NEAR5 treatment*) or (short-term* NEAR5 therapy) or (short-term* NEAR5 therapies) or (interpersonal* NEAR5 treatment*) or (interpersonal* NEAR5 therapy) or (interpersonal* NEAR5 therapies) or (logo* NEAR5 treatment*) or (logo* NEAR5 therapy) or (logo* NEAR5 therapies) or (mindfulness* NEAR5 treatment*) or (mindfulness* NEAR5 therapy) or (mindfulness* NEAR5 therapies) or (multimodal NEAR5 treatment*) or (multimodal NEAR5 therapy) or (multimodal NEAR5 therapies) or (narrative NEAR5 treatment*) or (narrative NEAR5 therapy) or (narrative NEAR5 therapies) or (positive NEAR5 treatment*) or (positive NEAR5 therapy) or (positive NEAR5 therapies) or (provocative NEAR5 treatment*) or (provocative NEAR5 therapy) or (provocative NEAR5 therapies) or (short-term NEAR5 treatment*) or (short-term NEAR5 therapy) or (short-term NEAR5 therapies) or (psychol* NEAR5 treatment*) or (psychol* NEAR5 therapy) or (psychol* NEAR5 therapies) or (oriented NEAR5 treatment*) or (oriented NEAR5 therapy) or (oriented NEAR5 therapies) or (rational* NEAR5 treatment*) or (rational* NEAR5 therapy) or (rational* NEAR5 therapies) or (reality NEAR5 treatment*) or (reality NEAR5 therapy) or (reality NEAR5 therapies) or (solution* NEAR5 treatment*) or (solution* NEAR5 therapy) or (solution* NEAR5 therapies) or (system* NEAR5 treatment*) or (system* NEAR5 therapy) or (system* NEAR5 therapies) or (transactional* NEAR5 treatment*) or (transactional* NEAR5 therapy) or (transactional* NEAR5 therapies) or (transpersonal NEAR5 treatment*) or (transpersonal NEAR5 therapy) or (transpersonal NEAR5 therapies) or (eclectic* NEAR5 treatment*) or (eclectic* NEAR5 therapy) or (eclectic* NEAR5 therapies) or (experiential* NEAR5 treatment*) or (experiential* NEAR5 therapy) or (experiential* NEAR5 therapies) or (expressive* NEAR5 treatment*) or (expressive* NEAR5 therapy) or (expressive* NEAR5 therapies) or (individual NEAR5 treatment*) or (individual NEAR5 therapy) or (individual NEAR5 therapies) or (insight* NEAR5 treatment*) or (insight* NEAR5 therapy) or (insight* NEAR5 therapies) or (persuasion NEAR5 treatment*) or (persuasion NEAR5 therapy) or (persuasion NEAR5 therapies) or (relationship NEAR5 treatment*) or (relationship NEAR5 therapy) or (relationship NEAR5 therapies) or (supportive* NEAR5 treatment*) or (supportive* NEAR5 therapy) or (supportive* NEAR5 therapies) or (implosive NEAR5 treatment*) or (implosive NEAR5 therapy) or (implosive NEAR5 therapies) or (inhibition NEAR5 treatment*) or (inhibition NEAR5 therapy) or (inhibition NEAR5 therapies) or (aversion NEAR5 treatment*) or (aversion NEAR5 therapy) or (aversion NEAR5 therapies) or (focused NEAR5 treatment*) or (focused NEAR5 therapy) or (focused NEAR5 therapies) or (shortterm* NEAR5 treatment*) or (shortterm* NEAR5 therapy) or (shortterm* NEAR5 therapies) or (long-term* NEAR5 treatment*) or (long-term* NEAR5 therapy) or (long-term* NEAR5 therapies) or (longterm* NEAR5 treatment*) or (longterm* NEAR5 therapy) or (longterm* NEAR5 therapies) or (inter-personal* NEAR5 treatment*) or (inter-personal* NEAR5 therapy) or (inter-personal* NEAR5 therapies) or (multi-modal NEAR5 treatment*) or (multi-modal NEAR5 therapy) or (multi-modal NEAR5 therapies) or (relaxation NEAR5 treatment*) or (relaxation NEAR5 therapy) or (relaxation NEAR5 therapies) or (talk NEAR5 treatment*) or (talk NEAR5 therapy) or (talk NEAR5 therapies) or (confront* NEAR5 treatment*) or (confront* NEAR5 therapy) or (confront* NEAR5 therapies) or (schema* NEAR5 treatment*) or (schema* NEAR5 therapy) or (schema* NEAR5 therapies) |
|--|---------------------------------------------------------------------------------------------------------------------------------------------------------------------------------------------------------------------------------------------------------------------------------------------------------------------------------------------------------------------------------------------------------------------------------------------------------------------------------------------------------------------------------------------------------------------------------------------------------------------------------------------------------------------------------------------------------------------------------------------------------------------------------------------------------------------------------------------------------------------------------------------------------------------------------------------------------------------------------------------------------------------------------------------------------------------------------------------------------------------------------------------------------------------------------------------------------------------------------------------------------------------------------------------------------------------------------------------------------------------------------------------------------------------------------------------------------------------------------------------------------------------------------------------------------------------------------------------------------------------------------------------------------------------------------------------------------------------------------------------------------------------------------------------------------------------------------------------------------------------------------------------------------------------------------------------------------------------------------------------------------------------------------------------------------------------------------------------------------------------------------------------------------------------------------------------------------------------------------------------------------------------------------------------------------------------------------------------------------------------------------------------------------------------------------------------------------------------------------------------------------------------------------------------------------------------------------------------------------------------------------------------------------------------------------------------------------------------------------------------------------------------------------------------------------------------------------------------------------------------------------------------------------------------------------------------------------------------------------------------------------------------------------------------------------------------------------------------------------------------------------------------------------------------------------------------------------------------------------------------------------------------------------------------------------------------------------------------------------------------------------------------------------------------------------------------------------------------------------------------------------------------------------------------------------------------------------------------------------------------------------------------------------------------------------------------------------------------------------------------------------------------------------------------------------------------------------------------------------------------------------------------------------------------------------------------------------------------------------------------------------------------------------------------------------------------------------------------------------------------------------------------------------------------------------------------------------------------------------------------------------------------------------------------------------------------------------------------------------------------------------------------------------------------------------------------------------------------------------------------------------------------------------------------------------------------------------------------------------------------------------------------------------------------------------------------------------------------------------------------------------------------------------------------------------------------------------------------------------------------------------------------------------------------------------------------------------------------------------------------------------------------------------------------------------------------------------------------------------------------------------------------------------------------------------------------------------------------------------------------------------------------------------------------------------------------------------------------------------------------------------------------------------------------------------------------------------------------------------------------------------------------------------------------------------------------------------------------------------------------------------------------------------------------------------------------------------------------------------------------------------------------------------------------------------------------------------------|

## Psyndex (Ovid)

|              |                                                                                                                                                                                                                                                                                                                                                                                                                                                                                                                                                                                                                                                                                                                                                                                                                                                                                                                                                                                                                                                                                                                                                                                                                                                                                                                                                                                                                                                                                                                 |
|--------------|-----------------------------------------------------------------------------------------------------------------------------------------------------------------------------------------------------------------------------------------------------------------------------------------------------------------------------------------------------------------------------------------------------------------------------------------------------------------------------------------------------------------------------------------------------------------------------------------------------------------------------------------------------------------------------------------------------------------------------------------------------------------------------------------------------------------------------------------------------------------------------------------------------------------------------------------------------------------------------------------------------------------------------------------------------------------------------------------------------------------------------------------------------------------------------------------------------------------------------------------------------------------------------------------------------------------------------------------------------------------------------------------------------------------------------------------------------------------------------------------------------------------|
| Diagnosis    | somatoform disorders/ or somatization disorder/ or somatization/ or hypochondriasis<br>Somat* or Hypochondri*tw.                                                                                                                                                                                                                                                                                                                                                                                                                                                                                                                                                                                                                                                                                                                                                                                                                                                                                                                                                                                                                                                                                                                                                                                                                                                                                                                                                                                                |
| Design       | (random* or zufa?!* or placebo* or zuweis*).mp. or (kontrol* or kompar* or relativ* or vergleich* or ((klin* or evaluat* or prospektiv*) adj3 (trial* or studi* or untersuch*)))tw. or exp treatment effectiveness evaluation/ or exp experimental design/ or versus.id. or vs.id.                                                                                                                                                                                                                                                                                                                                                                                                                                                                                                                                                                                                                                                                                                                                                                                                                                                                                                                                                                                                                                                                                                                                                                                                                              |
| Intervention | psychotherapy/ or adlerian psychotherapy/ or adolescent psychotherapy/ or analytical psychotherapy/ or autogenic training/ or brief psychotherapy/ or client centered therapy/ or cognitive behavior therapy/ or eclectic psychotherapy/ or emotion focused therapy/ or existential therapy/ or experiential psychotherapy/ or expressive psychotherapy/ or eye movement desensitization therapy/ or feminist therapy/ or geriatric psychotherapy/ or gestalt therapy/ or guided imagery/ or individual psychotherapy/ or insight therapy/ or integrative psychotherapy/ or interpersonal psychotherapy/ or logotherapy/ or narrative therapy/ or persuasion therapy/ or primal therapy/ or psychodrama/ or psychodynamic psychotherapy/ or rational emotive behavior therapy/ or reality therapy/ or relationship therapy/ or solution focused therapy/ or supportive psychotherapy/ or transactional analysis/ or exp behavior therapy/ or implosive therapy/ or reciprocal inhibition therapy/ or "response cost"/ or systematic desensitization therapy/ or exp aversion therapy/ or covert sensitization/ or exp exposure therapy/ or implosive therapy/ or systematic desensitization therapy/ or exp humanistic psychotherapy/ or existential therapy/ or gestalt therapy/ or humanism/ or exp humanistic psychology/ or transpersonal psychology/ or exp hypnotherapy/ or "age regression (hypnotic)"/ or exp psychoanalysis/ or dream analysis/ or self analysis/ or exp psychotherapeutic counseling/ |
|              | (Psychotherap* or Intervention* or (Zentriert* or Basiert* or Fundiert* or Fokussiert* or Akzeptanz or Bindung* or Verhalten* or Behavior?r* or Analytisch* or Kurz* or Person* or Kognitiv* or Dynamisch* or Energetisch* or Kohaerenz or Kollaborativ* or Kontemplativ* or dasein* or drama* or emotion* or Feministisch* or Sensibilisierung* or existen* or Exposition* or Gestalt* or Holistisch* or Ganzheitlich* or Humanistisch* or hypno* or Integr* or Kurzzeit* or Langzeit* or interpersonal* or logo* or Achtsamkeit* or mindfulness* or Multimodal* or Narrativ* or Positiv* or Provokativ* or Orientiert* or psychol* or rational* or Realitaet* or Loesung* or system* or Transaktion* or Transpersonal* or eklektisch* or Empirisch* or Expressiv* or Individu?!* or einzel* or Einsicht* or Ueberzeugung* or Beziehung* or Supportiv* or Unterstuetz* or Implosiv* or Inhibition* or Hemm* or Aversion* or Abneig* or Konfront* or Schema* or Relaxation* or Entspannung* or Gesprach*) adj5 (Behandlung* or Therapie or Therapien))tw                                                                                                                                                                                                                                                                                                                                                                                                                                                        |
