# Supplementary material
Source: publisher figshare collection journal article supplement (https://karger.figshare.com/articles/dataset/_/5127781)

## Appendix B: Flow chart of study selection

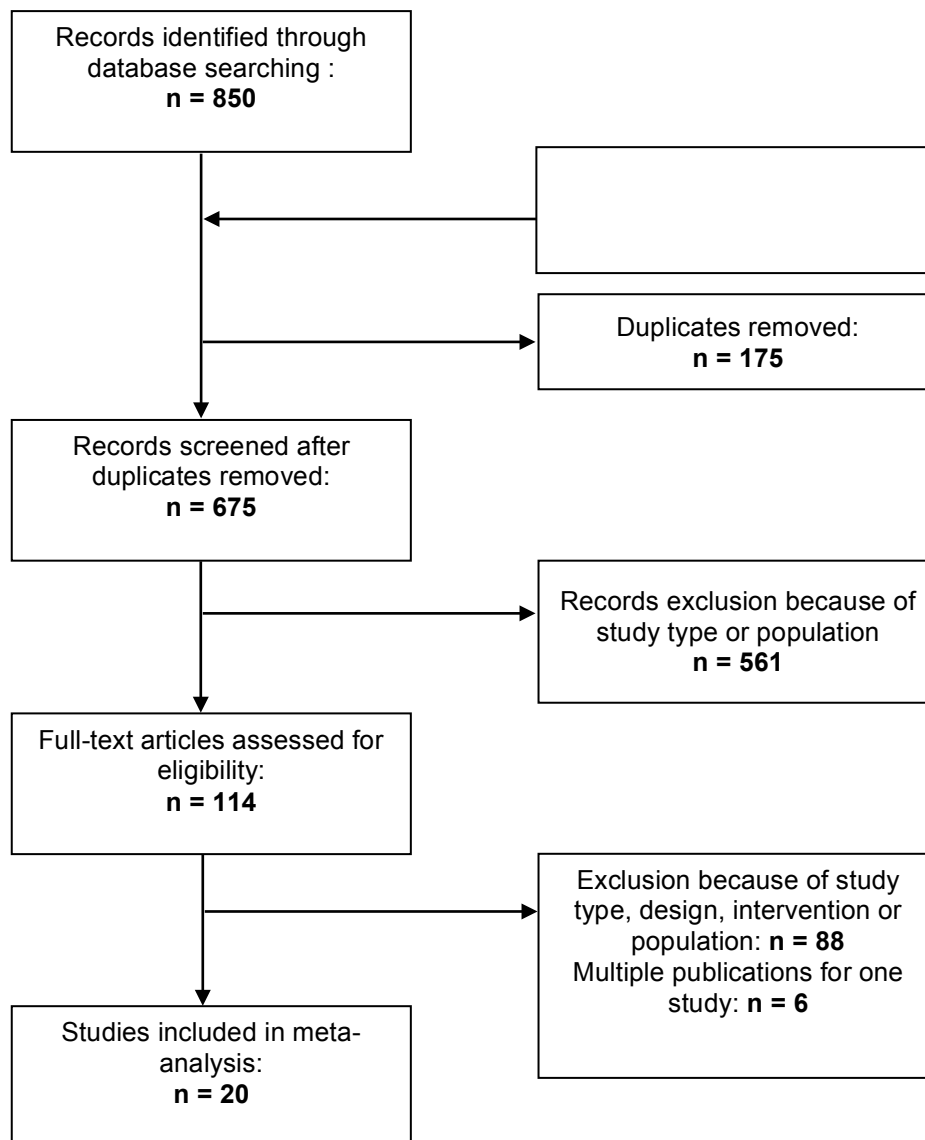

Supplement: Supplementary file 3 [file 1]
